# Supplementary material
Source: ML conference proceedings conference paper supplement (https://proceedings.mlr.press/v119/wang20w.html)
Supplement: Supplementary file 1 [file wang20w-supp.pdf]

---

# Supplementary - Cost-effectively Identifying Causal Effects When Only Response Variable is Observable

---

Tian-Zuo Wang<sup>1</sup> Xi-Zhu Wu<sup>1</sup> Sheng-Jun Huang<sup>2</sup> Zhi-Hua Zhou<sup>1</sup>

This is the supplementary for **Cost-effectively Identifying Causal Effects When Only Response Variable is Observable**. In Appendix A, we provide a detailed preliminary. Some notations in the proof are not mentioned in the main paper. We illustrate them here. Interventional-faithfulness, which is an important assumption to our method, is given in Appendix B. Appendix C shows the method of estimating the expectation of causal effects by Monte Carlo Methods. All the proofs for the main paper are provided in Appendix D. Appendix E reports some details of our experiments.

## Appendix A: Preliminary

In this part, we provide a detailed illustration of the concepts and notations in the main paper and supplementary.

Let  $G = (\mathbf{V}, \mathbf{E})$  be a graph consisting the vertices  $\mathbf{V}$  and edges  $\mathbf{E} \subseteq \mathbf{V} \times \mathbf{V}$ . In our context, the vertices represent the features  $X_1, X_2, \dots, X_p$  and the response variable  $Y$ . A directed edge is like  $V_i \rightarrow V_j$  or  $V_j \leftarrow V_i$  with an arrow in the edge, while an undirected edge is like  $V_j - V_i$ . A *directed (undirected) graph* is a graph whose edges are all directed (undirected). A *partially directed graph* may contain both directed and undirected edges. If we remove all the arrowheads from a graph  $G$ , we obtain the *skeleton* of the graph  $G$ . For two graph  $G_1 = (\mathbf{V}_1, \mathbf{E}_1)$  and  $G_2 = (\mathbf{V}_2, \mathbf{E}_2)$ ,  $G_1$  is a *subgraph* of  $G_2$  if  $\mathbf{V}_1 \subseteq \mathbf{V}_2$  and  $\mathbf{E}_1 \subseteq \mathbf{E}_2$ . The *subgraph induced by  $\mathbf{V}'$*  in  $G$  comprises of the vertices in  $\mathbf{V}'$  and all the edges between the vertices in  $\mathbf{V}'$ . We denote it by  $G[\mathbf{V}']$ .

For any two vertices  $V_i$  and  $V_j$  in graph  $G = (\mathbf{V}, \mathbf{E})$ , if there is an edge between them, they are *adjacent*. The *adjacency set* of a vertice  $V_i$  contains all the vertices adjacent to  $V_i$ . We denote it by  $adj_i(G)$ . If  $V_i \rightarrow V_j$  ( $V_j \rightarrow V_i$ ),  $V_i$  is a *parent (child)* of  $V_j$ . A *directed path* from  $V_i$  to  $V_j$  represents there exists a set of vertices  $\{V_{i_1}, V_{i_2}, \dots, V_{i_k}\} \subset V$  such that  $V_i \rightarrow V_{i_1}, V_{i_1} \rightarrow V_{i_2}, \dots, V_{i_k} \rightarrow V_j$ . The *partially directed path* allows for the undirected edge in the set of vertices. If there is a directed path from  $V_i$  to  $V_j$  (from  $V_j$  to  $V_i$ ), then  $V_i$  is an *ancestor (descendant)*. Every vertice is an ancestor (descendant) of itself. We denote the parents (children, ancestors, descendants) set of vertice  $V_i$  in graph  $G$  by  $\text{Pa}_i[G], \text{Chd}_i[G], \text{Anc}_i[G], \text{Des}_i[G]$ . Sometimes, we will simplify them to  $\text{Pa}_i, \text{Chd}_i, \text{Anc}_i, \text{Des}_i$ . In a partially directed graph  $G$ , *siblings* of vertice  $V_i$  is the vertice set in which each has an undirected edge with  $V_i$ . We denote the *siblings* of vertice  $V_i$  by  $\text{Sib}_i[G]$  or  $\text{Sib}_i$ , and denote the undirected edges set of  $V_i$  by  $E_{\text{Sib}_i}$ .

In a graph, there is a *directed (partially) cycle* if there is a *directed (partially) path* starts and ends in the same point. It is worthy to note that there exists at least one directed edge in the partially cycle. If there is no such a directed cycle, the graph is *acyclic*. For any triples of vertices in a graph such that  $V_i \rightarrow V_k \leftarrow V_j$  and  $V_i$  is not adjacent to  $V_j$ , they constitute a *v-structure*, in which  $V_k$  is a *collider*. The conditional independence can be identified by *d-separation*.  $V_i$  and  $V_j$  are not d-separated by a vertice set  $V'$  in a path  $\mathcal{L}$  if and only if for every collider in the path, at least one of its descendant belongs to  $V'$  and  $V'$  has no non-colliders in the path  $\mathcal{L}$ . For two variables set  $V_1$  and  $V_2$ , if every path from  $V_1$  to  $V_2$  is d-separated by a variable set  $V'$ ,  $V_1$  is *conditional independent* of  $V_2$  given  $V'$ . A (partial) causal graph is a *(partially) directed acyclic graph*, which is *DAG(PDAG)* for short. The directed edge reflects a causal relation.

If two DAGs share the same conditional independence, they are *Markov equivalent*. Two DAGs are Markov equivalent if and only if they share the same skeleton and same v-structures. The *Markov equivalence class (MEC)* is a set of DAG in

---

<sup>1</sup>National Key Laboratory for Novel Software Technology, Nanjing University, Nanjing, China <sup>2</sup>College of Computer Science and Technology, Nanjing University of Aeronautics and Astronautics, Nanjing, China. Correspondence to: Sheng-Jun Huang <huangs@nuaa.edu.cn>, Zhi-Hua Zhou <zhouzh@lamda.nju.edu.cn>.

which each graph is Markov equivalent to others. An *essential graph* is a partially directed acyclic graph, and the edge is  $V_i \rightarrow V_j$  if and only if in each DAG of MEC the edge is  $V_i \rightarrow V_j$ . A partially directed graph is a *chain graph* if there is no partially cycle (Lauritzen & Richardson, 2002). As shown in (Andersson et al., 1997), the essential graph is a chain graph. After deleting the directed edges in a chain graph, we divide it into a few *chain components* whose variables are connected in an undirected graph.

In this paper, capital and lower-case letters denote random variables and values respectively. In Pearl’s *do-calculus* framework (Pearl, 2009),  $do(X = x)$  represents intervening on variable  $X$  with value  $x$ . The causal effect of  $X_i$  on  $Y$  is denoted by  $P(Y|do(X_i))$ . We would claim  $X_i$  has a causal effect on  $Y$  if  $X_i$  is an ancestor of  $Y$  because an intervention on  $X$  will influence  $Y$ . Otherwise, we say  $X_i$  has *no causal effect* on  $Y$ .

A set of variables  $\mathbf{Z}$  is called back-door admissible set for  $(X_i, Y)$  in a DAG  $G$  if no variable in  $\mathbf{Z}$  is a descendant of  $X_i$  and  $\mathbf{Z}$  blocks every path between  $X_i$  and  $Y$  that contains an arrow into  $X_i$ . By definition,  $\text{Pa}_i$  is one of the back-door admissible sets for  $(X_i, Y)$ . With back-door admissible set  $\mathbf{Z}$  for  $(X_i, Y)$ , we have

$$P(Y|do(X_i = x_i)) = \int_{\mathbf{Z}} P(\mathbf{Z})P(Y|X_i = x_i, \mathbf{Z}) d\mathbf{Z}. \quad (1)$$

## Appendix B: Interventional-faithfulness Assumption

In this section, we give a detailed illustration about the interventional-faithfulness assumption. It is important to our method. We first define *minimal parental back-door admissible set*, followed by the assumption.

**Definition 1** (Minimal Parental Back-door Admissible Set (MPS)).  $\mathbf{M}$  is called a minimal parental back-door admissible set for  $(X_i, Y)$  in a DAG  $G$  if (1). all variables in  $\mathbf{M}$  are parents of  $X_i$ , (2).  $\mathbf{M}$  is a back-door admissible set for  $(X_i, Y)$ , (3). no variable in  $\mathbf{M}$  is conditional independent of  $Y$  given  $X_i$  and the other variables in  $\mathbf{M}$ .

**Assumption 1** (Interventional-faithfulness). *For two Markov equivalent DAGs with the same observational distribution, if  $X_i \in \text{Anc}_Y$  and minimal parental back-door admissible sets for  $(X_i, Y)$  are different in the two DAGs, then  $P(Y|do(X_i = x))$  are different in the two DAGs.*

Now, we give an example to intuitively illustrate it. See Fig 1, the causal effect of  $X = x$  on  $Y$  is  $\int_{\mathbf{Z}} P(\mathbf{Z})P(Y|X, \mathbf{Z}) d\mathbf{Z}$  in Structure 1, while it is  $\int_{\mathbf{T}} P(\mathbf{T})P(Y|X = x, \mathbf{T}) d\mathbf{T}$  in Structure 2. And they share different minimal parental back-door admissible set  $\{Z\}$  and  $\{T\}$  for  $(X, Y)$ . The interventional-faithfulness assumes that given a common joint observational distribution, the causal effect  $\int_{\mathbf{Z}} P(\mathbf{Z})P(Y|X, \mathbf{Z}) d\mathbf{Z}$  is not equivalent to  $\int_{\mathbf{T}} P(\mathbf{T})P(Y|X = x, \mathbf{T}) d\mathbf{T}$ , i.e. it is impossible that  $P(Y|do(X_i)) = \int_{\mathbf{Z}} P(\mathbf{Z})P(Y|X, \mathbf{Z}) d\mathbf{Z} = \int_{\mathbf{T}} P(\mathbf{T})P(Y|X = x, \mathbf{T}) d\mathbf{T}$ . The reason we introduce the concept of minimal parental back-door admissible set in our assumption is to differentiate our assumption with “The causal effect implies the only causal graph”. For example, the causal effects of  $X$  on  $Y$  are the same in Structure 1 and 3. But the causal graphs are evidently different. We rule out this situation by introducing minimal parental back-door admissible sets. The assumptions are towards only the causal graphs with different minimal parental back-door admissible sets.

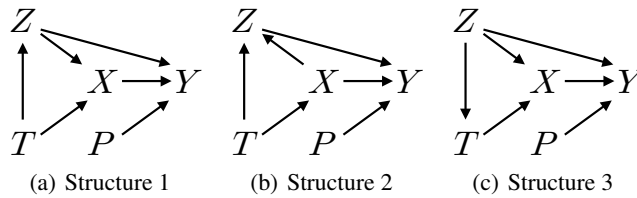

Figure 1. We assume the causal effects of  $X$  on  $Y$  are different in the first two structures under a common joint distribution, while those in Structure 1 and 3 are equivalent.

Then, we give a brief analysis to show intervention-faithfulness is hardly violated under the faithfulness assumption.

**Analysis.** *If intervention-faithfulness is violated, that is, for two DAGs  $G$  and  $H$  with different MPS  $\mathbf{V}_1$  and  $\mathbf{V}_2$  for  $(X_i, Y)$ ,*

their causal effects are the same. It holds

$$P_G(Y|do(X = x)) = \int P(\mathbf{V}_1)P(Y|X = x, \mathbf{V}_1) d\mathbf{V}_1, \quad (2)$$

$$P_H(Y|do(X = x)) = \int P(\mathbf{V}_2)P(Y|X = x, \mathbf{V}_2) d\mathbf{V}_2. \quad (3)$$

We find  $\mathcal{A}$  and  $\mathcal{B}$  such that  $\mathbf{V}_1 \cup \mathcal{A} = \mathbf{V}_2 \cup \mathcal{B}$ ,  $\mathcal{A} \subseteq \mathbf{V}_2$ ,  $\mathcal{B} \subseteq \mathbf{V}_1$ ,  $\mathcal{A} \cap \mathcal{B} = \emptyset$ . If the causal effects are the same, that is

$$\begin{aligned} & \int P(\mathbf{V}_1)P(Y|X = x, \mathbf{V}_1, \mathcal{A})P(\mathcal{A}|X = x, \mathbf{V}_1) d\mathbf{V}_1 d\mathcal{A} \\ &= \int P(\mathbf{V}_2)P(Y|X = x, \mathbf{V}_2, \mathcal{B})P(\mathcal{B}|X = x, \mathbf{V}_2) d\mathbf{V}_2 d\mathcal{B}. \end{aligned}$$

We thus have

$$\begin{aligned} 0 &= \int [P(\mathbf{V}_1)P(\mathcal{A}|X = x, \mathbf{V}_1) - P(\mathbf{V}_2)P(\mathcal{B}|X = x, \mathbf{V}_2)]P(Y|X = x, \mathbf{V}_1, \mathcal{A}) d\mathbf{V}_1 d\mathcal{A} \\ &= \int f(\mathcal{A}, \mathbf{V}_1)P(Y|X = x, \mathbf{V}_1, \mathcal{A}) d\mathbf{V}_1 d\mathcal{A}, \forall x, \end{aligned}$$

where  $f(\mathcal{A}, \mathbf{V}_1) = P(\mathbf{V}_1)P(\mathcal{A}|X = x, \mathbf{V}_1) - P(\mathbf{V}_2)P(\mathcal{B}|X = x, \mathbf{V}_2)$ . Here it is not hard to see

$$\int f(\mathcal{A}, \mathbf{V}_1) d\mathbf{V}_1 d\mathcal{A} = 0.$$

We first prove that  $f(\mathcal{A}, \mathbf{V}_1) \not\equiv 0$ . If  $f(\mathcal{A}, \mathbf{V}_1) \equiv 0$ , that means

$$\begin{aligned} P(\mathbf{V}_1)P(\mathcal{A}|X = x, \mathbf{V}_1) &= P(\mathbf{V}_2)P(\mathcal{B}|X = x, \mathbf{V}_2) \\ P(X = x|\mathbf{V}_1) &= P(X = x|\mathbf{V}_2). \end{aligned}$$

Without loss of generality, we assume  $\mathcal{A} \neq \emptyset$ . We conclude

$$P(X = x|\mathbf{V}_1) = P(X = x|\{\mathbf{V}_2 \setminus \mathcal{A}\}, \mathcal{A}) = P(X = x|\{\mathbf{V}_2 \setminus \mathcal{A}\}).$$

The second equation holds because  $\mathcal{A} \cap \mathbf{V}_1 = \emptyset$ . Hence  $X \perp \mathcal{A}|\{\mathbf{V}_2 \setminus \mathcal{A}\}$ . It contradicts the faithfulness assumption, because there exists edges between  $X$  and variables in  $\mathcal{A}$ .

Hence, we know that  $f(\mathcal{A}, \mathbf{V}_1) \not\equiv 0$ . We notice if the interventional-faithfulness is violated, that means given any  $x$ , the weighted sum of a series of distribution of  $Y$  should happen to equal to zero, where the sum of the weight is zero, and the weight is not a function of  $Y$  as well as not always zero. It is reasonable to think such a situation hardly happens.

## Appendix C: The Expectation Estimation of Causal Effects

In this part, we introduce our method for estimating the expectation of causal effects in the main paper. The equation is

$$\mathbb{E}(Y|do(X_i = x_i)) = \int_Y Y \int_{\mathbf{M}_j} P(\mathbf{M}_j)P(Y|X_i = x_i, \mathbf{M}_j) d\mathbf{M}_j dY, \quad (4)$$

$$= \int_{\mathbf{M}_j} P(\mathbf{M}_j)\mathbb{E}(Y|X_i = x_i, \mathbf{M}_j) d\mathbf{M}_j. \quad (5)$$

The estimation in (4) is prone to suffer the curse of dimensionality, because it gets harder to estimate  $P(Y|X_i = x_i, \mathbf{M}_j)$  as the growth of the dimension of  $\mathbf{M}_j$ . Hence we estimate it avoiding the high-dimensional estimation by Monte Carlo Methods. We divide the estimation of (5) into two steps. First, we train a regression model  $\hat{f}$  from  $X_i$  and  $\mathbf{M}_j$  to  $Y$  based on the observational data in order to predict the expectation  $\mathbb{E}(Y|X_i = x_i, \mathbf{M}_j)$ . The predicted value for  $X_i = x_i$  and  $\mathbf{M}_j = \mathbf{m}_0$  is  $\hat{f}(x_i, \mathbf{m}_0)$ . Then, we sample  $\mathbf{m} \sim P(\mathbf{M}_j)$  with replacement from the observational data. With a sample  $\mathbf{m}_k$

and the intervention value  $x_i$ , we estimate  $\mathbb{E}(Y|X = x_i, \mathbf{m}_k)$  with the trained regression model. The result is denoted by  $\hat{Y}_k$ . Repeat the process of sampling and estimation for many times and get  $\hat{Y}_1, \hat{Y}_2, \dots, \hat{Y}_n$ . Then,

$$\hat{\mathbb{E}}_{G_j}(Y|do(X = x_i)) = \frac{1}{n} \sum_{k=1}^n \hat{Y}_k. \quad (6)$$

Here we give an example to provide reasonableness for the regression step in estimating the expectation  $\mathbb{E}(Y|X_i = x_i, \mathbf{M}_j)$ . Assume a linear relation  $Y = \beta_0 X + \beta^T \mathbf{M}_j + \epsilon$ ,  $\epsilon \sim (0, \sigma^2)$  between the variables, where  $\mathbf{M}_j$  is the minimal parental back-door admissible set. It holds that  $\mathbb{E}(Y|X = x_i, \mathbf{m}_0) = \beta_0 x_i + \beta^T \mathbf{m}_0$ . Our predicted value is  $\hat{f}(x_i, \mathbf{m}_0) = \hat{\beta}_0 x_i + \hat{\beta}^T \mathbf{m}_0$ . Due to the property of linear model,  $\hat{\beta}_0$  and  $\hat{\beta}$  are all unbiased estimate of  $\beta_0$  and  $\beta$ . Hence,  $\hat{f}(x_i, \mathbf{m}_0)$  is an unbiased estimate of  $\mathbb{E}(Y|X = x_i, \mathbf{m}_0)$ . It seems reasonable to use the regression result to estimate the expectation given  $x_i$  and  $\mathbf{m}_0$ .

## Appendix D: Theoretical Guarantee

In this part we provide the proofs in the main paper. In Part D.1, we present some detailed proofs about the proposed method, which is in Section 3 in the main paper. In Part D.2, the related proofs about the causal effect identifiability are given. In Part D.3, we give the proof about the intervention cost analysis.

### D.1: proof about the proposed method

**Theorem 1.** *The causal effect of each variable on the response variable  $Y$  is identifiable if and only if all ancestor edges (ancestor causal structure) are identified.*

*Proof.* The adequacy and necessity are proved, respectively.

$\Rightarrow$ . We prove it by reduction to absurdity. Without loss of generality, we assume an ancestor edge  $X_i \rightarrow X_j$  has not been identified. According to the definition of *ancestor edges*, after deleting the edge between  $X_i$  and  $X_j$ , there exists at least one variable from  $X_i, X_j$  having a directed path to  $Y$ . If both have directed paths to  $Y$  (the edge between  $X_i$  and  $X_j$  is not in the path), whether  $X_i \rightarrow X_j$  or  $X_i \leftarrow X_j$  determines different minimal parental back-door variable sets for  $(X_i, Y)$  in (1), which takes a different causal effect of  $X_i$  on  $Y$  in general. If only one variable has a directed path to  $Y$  while the other one is not located in the path, we assume it is  $X_i \rightarrow \dots \rightarrow Y$ . If  $X_i \rightarrow X_j$ ,  $X_j$  has no causal effect to  $Y$ . If  $X_i \leftarrow X_j$ , intervention on  $X_j$  will take a change to  $Y$ . Hence, we cannot determine the causal effect of  $X_j$  on  $Y$  without the direction of the  $X_i - X_j$ , which contradicts the condition.

$\Leftarrow$ . If the ancestors edges are all identified, the set  $\text{Anc}_Y$  is determined. For any  $X \in V \setminus \text{Anc}_Y$ , it holds  $\mathbb{E}(Y|do(X = x)) = \mathbb{E}(Y)$ . For  $X \in \text{Anc}_Y$ , because all edges of  $X$  are identified, we can determine the back-door variables and calculate the causal effect by back-door criterion. Hence, the causal effect of each variable on  $Y$  is identifiable.  $\square$

**Proposition 2.** *In a chain component  $C$  of chain graph  $G$ , if the response variable  $Y \notin C$  and there does not exist a directed path from  $v$  to  $Y$  for any variable  $v \in C$  in  $G$ , then there is no directed path from  $C$  to  $Y$  in the causal graph.*

*Proof.* If such a path  $v \rightarrow \dots \rightarrow Y$  exists in the causal graph, then  $v \rightarrow V_1 \rightarrow \dots \rightarrow V_k \rightarrow Y$  and some edges  $V_i \rightarrow V_{i+t} \in G_\tau$ ,  $V_{i-1} \rightarrow V_i \notin G_\tau$  and  $V_{i+t} \rightarrow V_{i+t+1} \notin G_\tau$ , where  $G_\tau$  is a chain component. According to Lemma 10 by He & Geng (2008), if a variable  $S$  outside a chain component  $\mathcal{G}'$  has a directed edge to  $X$  in  $\mathcal{G}'$ , then there is a directed edge from  $S$  to all the variables in  $\mathcal{G}'$ . Therefore, the path can be shorten to  $v \rightarrow V_1 \rightarrow V_{i-1} \rightarrow V_{i+t} \rightarrow \dots \rightarrow V_k \rightarrow Y$ . Repeat it and we can get a directed path from a variable in  $C$  to  $Y$  that doesn't contain any edges in other chain components. It contradicts the condition.  $\square$

### D.2 proof about causal effect identifiability

**Lemma 1.** *Under Assumption 1 and our intervention variable selection strategy, if  $X$  is intervened in chain component  $C$ ,  $Y \notin C$ , undirected edges exist between  $\text{Anc}_Y[\check{C}]$ , then all the undirected edges between  $X$  and the "next" variable located in the shortest undirected path  $\mathcal{P}$  from  $X$  to any variable  $Z \in \text{Anc}_Y[\check{C}]$  can be identified by the intervention, the "next" variable is the one adjacent to  $X$  in  $\mathcal{P}$ .*

*Proof.* For any other variable  $Z (\neq X)$  in  $\text{Anc}_Y[\check{C}]$ , we assume the shortest undirected path between  $X$  and  $Z$  is  $X - V_{a_1} - V_{a_2} - \dots - V_{a_k} - Z$ . We prove the causal relation between  $X$  and  $V_{a_1}$  can be identified by intervening on  $X$  because the different orientations of  $X - V_{a_1}$  lead to different minimal parental back-door admissible set for  $X, Y$ , which lead to different causal effects by interventional-faithfulness assumption.

If  $X \rightarrow V_{a_1}$ ,  $V_{a_1}$  cannot be in the minimal parental back-door admissible set  $\mathbf{M}_X$  for  $(X, Y)$ .

While if  $V_{a_1} \rightarrow X$ ,  $V_{a_1}$  must be in  $\mathbf{M}_X$ . Otherwise, there exists a  $\mathbf{T} \subseteq \text{Sib}_X \cup \text{Pa}_X$ , such that  $V_{a_1} \perp Y | \{X, \mathbf{T}\}$ . With  $Z \in \text{Anc}_Y[\check{C}]$ , we first prove  $\{X, \text{Pa}_X\}$  cannot  $d$ -separate  $V_{a_1}$  and  $Y$  in the path  $X - V_{a_1} - V_{a_2} - \dots - V_{a_k} - Z \rightarrow \dots \rightarrow Y$ :

At first, we notice  $\{X, \text{Pa}_X\}$  cannot  $d$ -separate the shortest path from  $V_{a_1}$  to  $Z$ . To achieve  $d$ -separation  $V_{a_1} \perp Y | \{X, \text{Pa}_X\}$ , at least one variable  $V'$  should  $d$ -separate the directed path from  $Z$  to  $Y$ . In the condition that  $V' \in \text{Pa}_X$ , if  $V' \notin C$ , it holds  $V' \rightarrow Z$  (Lemma 10 of He & Geng (2008)), hence the  $d$ -separation is impossible. If  $V' \in C$ , if the  $d$ -separation holds, all the directed path from  $Z$  to  $Y$  will go through such  $V'$ , which contradicts the definition of  $\text{Anc}_Y[\check{C}]$ , because  $Z \in \text{Anc}_Y[\check{C}]$  so that  $Z$  should have a directed path to  $Y$  in which no variables in  $C$  exist. Hence the variables in  $\text{Pa}_X$  cannot  $d$ -separate the path from  $Z$  to  $Y$ ;

We also notice  $X$  is evidently not in the directed path from  $Z$  to  $Y$ , which leads to it cannot  $d$ -separate the path from  $Z$  to  $Y$ . We then get the conclusion  $\{X, \text{Pa}_X\}$  cannot  $d$ -separate the path from  $V_{a_1}$  to  $Y$ .

Therefore, if  $V_{a_1} \perp Y | \{X, \mathbf{T}\}$ , there is at least one  $V_t \in \text{Sib}_X$  such that  $V_{a_1}$  is  $d$ -separated with  $Y$  by  $V_t$  in that path. We have  $V_t \in \{V_{a_2}, \dots, V_{a_k}\}$ . There is an undirected path  $X - V_t - \dots - Z$ , which contradicts the shortest path assumption. Therefore  $V_{a_1}$  must be in  $\mathbf{M}_X$ . By interventional-faithfulness assumption, the causal effects when  $X \rightarrow V_{a_1}$  and  $X \leftarrow V_{a_1}$  are different, so that we can identify this edge with the distribution of  $Y$  under intervention on  $X$ .  $\square$

### D.3 proof about intervention cost analysis

In this part, we provide the related proofs for the interventional cost analysis section in the main paper. We assume plenty of observational data. According to them we can obtain the correct essential graph. Based on the essential graph, we make experiments and analyze the expected number of interventions to identify the ancestor causal structure, i.e., make causal effect identification. The number of interventions do not include of that obtaining the observational data.

**Proposition 4.** For a line skeleton with  $p + 1 \geq 4$  variables  $X_1, \dots, X_p, Y$ , if all the causal relations and positions of variables  $X_1, \dots, X_p, Y$  are totally random, then the expected number of interventions to make causal effect identification is  $\frac{19}{8} - \frac{39}{8p+8} + \frac{6}{p+1}(\frac{1}{2})^p < 3$ .

*Proof.* At first, we consider  $Y$  is at one end of a line with  $m$  variables and denote the intervention times in such line by  $\#s(m)$ . For the graph  $Y - X_1 - X_2 - \dots$ , there are three conditions  $Y \leftarrow X_1 - \dots$ ,  $Y \rightarrow X_1 \leftarrow X_2 - \dots$ ,  $Y \rightarrow X_1 \rightarrow X_2 - \dots$  with possibilities  $\frac{1}{2}, \frac{1}{4}, \frac{1}{4}$ . For the second condition, they form a v-structure so that we can identify no variables from  $X_1 \dots, X_{m-1}$  are the ancestors of  $Y$  by observational data. Hence the number of interventions is zero. For others condition, we will intervene on  $X_1$  to identify the edges between  $X_1$  and  $Y$ . We keep intervening until identifying all ancestor edges. We have

$$\mathbb{E}(\#s(m)) = 0 \times \frac{1}{4} + 1 \times \frac{1}{4} + (1 + \mathbb{E}(\#s(m-1))) \times \frac{1}{2}.$$

Recursively, we can conclude that

$$\mathbb{E}(\#s(m)) = \frac{2}{3} - \left(\frac{1}{2}\right)^{m-1}, m \geq 2.$$

When we analyze the number of interventions in a random line skeleton, the randomness is generated from three parts. The first one is the random positions of  $Y$ . The second one is the random causal edges in the real structure. The last one is the intervention variable selection.  $Y$  is located in each position of the line skeleton with the same possibility. Without loss of generality, we assume the skeleton is  $X_1 - X_{i-1} - Y - X_i - \dots - X_p, 3 \leq i \leq p-1$  (The condition that  $i = 1, 2, p, p+1$  can be analyzed similarly, we thus omit them here). We first consider the edges  $X_{i-1} - Y - X_i$ . In the real causal graph, there are four conditions  $X_{i-1} \leftarrow Y \rightarrow X_i, X_{i-1} \rightarrow Y \leftarrow X_i, X_{i-1} \rightarrow Y \rightarrow X_i, X_{i-1} \leftarrow Y \leftarrow X_i$ , each of them is with the possibility  $\frac{1}{4}$ .

Take  $X_{i-1} \rightarrow Y \rightarrow X_i$  as an example, if the edges between  $X_i$  and  $X_{i+1}$  is  $X_i \leftarrow X_{i+1}$ , the edge between  $Y$  and  $X_i$  can be identified by observational data because  $Y, X_i, X_{i+1}$  form a v-structure, so that we do not need to do interventions to identify  $X_i - X_{i+1}$ . And the number of interventions to identify  $X_{i-1} - Y$  is 1. When  $X_i \rightarrow X_{i+1}$ , we select the intervention variable from  $X_{i-1}$  and  $X_i$  with the same possibility  $\frac{1}{2}$ . If we intervene on  $X_{i-1}$ , both  $X_{i-1} \rightarrow Y$  and  $Y \rightarrow X_i$  can be identified because of Meek rules, that is we take one experiment to identify  $X_i \rightarrow Y \rightarrow X_{i+1}$ . But if we intervene on  $X_i$ , we have to take another intervention on  $X_{i-1}$  to identify the edge  $X_{i-1} - Y$ , that is we take two experiments to identify  $X_i \rightarrow Y \rightarrow X_{i+1}$ . Because the variables after  $X_{i+1}$  can not be ancestors of  $Y$ , we do not identify their causal relation. The expected number of interventions to identify the causal effect of the variables in  $X_1 - \dots - X_{i-1}$  on  $Y$  is  $\mathbb{E}(\#s(i-1))$ .

Hence, when  $Y$  is in the  $i$ -th position of the line and  $X_{i-1} \rightarrow Y \rightarrow X_i$ , the expected number of experiments to identify the causal effect of each variable on  $Y$  is

$$\begin{aligned}\mathbb{E}_{X_{i-1} \rightarrow Y \rightarrow X_i}(\#(i)) &= \frac{1}{2} \times 1 + \frac{1}{2} \times \left( \frac{1}{2} \times 1 + \frac{1}{2} \times 2 \right) + \mathbb{E}(\#s(i-1)) \\ &= \frac{5}{4} + \mathbb{E}(\#s(i-1)).\end{aligned}$$

Similarly, we have the expected number of experiments when  $X_{i-1} \leftarrow Y \rightarrow X_i$ ,  $X_{i-1} \rightarrow Y \leftarrow X_i$ ,  $X_{i-1} \leftarrow Y \leftarrow X_i$ . In total, we have

$$\begin{aligned}\mathbb{E}(\#\mathcal{E}(p+1)) &= \frac{1}{p+1} \sum_{i=1}^{p+1} \frac{1}{4} \left( \mathbb{E}_{X_{i-1} \rightarrow Y \rightarrow X_i}(\#(i)) + \mathbb{E}_{X_{i-1} \rightarrow Y \leftarrow X_i}(\#(i)) \right. \\ &\quad \left. + \mathbb{E}_{X_{i-1} \leftarrow Y \rightarrow X_i}(\#(i)) + \mathbb{E}_{X_{i-1} \leftarrow Y \leftarrow X_i}(\#(i)) \right) \\ &= \frac{19}{8} - \frac{39}{8p+8} + \frac{6}{p+1} \left( \frac{1}{2} \right)^p, p \geq 3,\end{aligned}$$

$i$  is the position of  $Y$  in the line skeleton. The proof completes.  $\square$

By Eberhardt (2007), the expected number of interventions have been studied in depth, where they take singleton hard interventions and observe whole variables, as well as discover the edges by whether the distribution of some variable takes a change under an intervention on other variables. In the following, instead of repeating the setting and approach above, we will say ‘‘by approach of Eberhardt (2007)’’ for short. We compare the intervention cost by our approach with them. But our approach is only allowed to have the interventional data of response variable. Because we focus on making causal effect identification, i.e. discovering ancestor causal structure, while Eberhardt (2007) identifies the whole causal structure, we first give following lemmas to conclude the properties of their approach when focusing on ancestor causal structure.

**Definition 2** (Causal order). Given a set of variables  $\{X_1, \dots, X_p, Y\}$  and their causal graph, its causal order is an order that any variable is not the ancestor of any former variables in the causal order.

**Lemma 2** (Eberhardt (2007)). *Given a set of  $p+1 \geq 2$  causally sufficient variables, the worst case expected number of experiments necessary and sufficient to discover the causal structure is  $\frac{2}{3}(p+1) - \frac{1}{3}$  experiments if only one variable can be subject to a structural intervention per experiment.*

The worst case is when the causal graph is complete. That is, for a complete causal graph, the expected number of interventions is  $\frac{2}{3}(p+1) - \frac{1}{3}$ . Then, we conclude Lemma 3.

**Lemma 3.** *For a complete causal graph  $G$  with variables  $X_1, X_2, \dots, X_p, Y$ , in which  $Y$  is the descendant of all the other variables, the expected number of interventions to identify the ancestor causal structure is  $\frac{2}{3}(p+1) - \frac{1}{3}$  by the approach of Eberhardt (2007), i.e. taking singleton hard interventions and observing the whole variables. The ratio of the expected number to the variable number converges to  $\frac{2}{3}$  when  $p \rightarrow \infty$ .*

In this condition, all the edges in graph  $G$  are ancestor edges. We thus have to identify all of them. Hence the expected number is same as Lemma 2. Next, we will consider the expected number of interventions to identify the ancestor causal structure, i.e. make causal effect identification, in general complete causal graph.

**Lemma 4.** *The expected number of interventions  $T(p)$  to identify the ancestor causal structure of a random complete causal graph composed of  $X_1, \dots, X_p, Y$  by the approach of Eberhardt (2007), i.e. taking singleton hard interventions and observing the whole variables, is bounded by  $\frac{p+1}{3} + \frac{2}{3} \frac{1}{p+1} \leq T(p) \leq \frac{p+1}{3} + \frac{5}{3} \frac{1}{p+1} + \frac{p+2}{p+1} \ln \frac{p+1}{2}$ . The ratio of the expected number to the variable number converges to  $\frac{1}{3}$  when  $p \rightarrow \infty$ .*

*Proof.* In a complete graph, there is an exact causal order for  $p + 1$  variables, in which  $Y$  is located in each position with the same possibility. Without loss of generality, we assume the causal order is  $X_1, X_2, \dots, X_{i-1}, Y, X_i, \dots, X_p$ . We divide the graph into two parts. One is the subgraph induced by  $Y, X_j, 1 \leq j \leq i - 1$ . The expected number of interventions is  $S(i) = \frac{2}{3}i - \frac{1}{3}, i \geq 2$  by Lemma 3 because  $Y$  is the descendant of all other variables  $X_1, \dots, X_{i-1}$ . The other is the subgraph induced by  $Y, X_j, j \geq i$ .

First, we prove for a complete causal graph with  $m$  variables in which  $Y$  is not descendants of any variables, the expected number of interventions is  $1 + \sum_{i=3}^m \frac{1}{i}, m \geq 3$ . We denote it by  $L(m)$ . We assume the variables are  $X_1, \dots, X_{m-1}, Y$  (It is different from the notation in the beginning). And we assume the causal order is  $X_0, X_1, \dots, X_{m-1}$ , where  $X_0$  is  $Y$ . Because each variable is equally likely to be subject to an intervention in the first experiment. We denote the intervention variable by  $X_j$ . It holds

$$L(m) = 1 + \frac{1}{m} \sum_{j=0}^{m-1} L(j), m \geq 2,$$

where  $L(0) = 0, L(1) = 0, L(2) = 1$ . The first term 1 is an intervention cost on  $X_j$ . By the interventional data of the full variables, we can see  $X_k \rightarrow X_j, 0 \leq k < j$  and  $X_k \leftarrow X_j, k > j$ . Hence we identify that  $X_k, k \geq j$  are the descendants of  $X_j, X_0$  is an ancestor of  $X_j$ . We thus know all of  $X_k, k \geq j$  are descendants of  $X_0$  and their undirected edges are not ancestor edges. The remaining undirected edges to be oriented are just that between  $X_0, X_1, \dots, X_{j-1}$ . The expected number of interventions to discover these is  $L(j)$ . By transformations,

$$\sum_{j=0}^{m-1} [L(m) - L(j)] = m.$$

We denote  $L(m) - L(j) = \sum_{i=j+1}^m b_i$ . It holds

$$\sum_{i=1}^m i b_i = m,$$

Similarly, we have

$$\sum_{i=1}^{m+1} i b_i = m + 1,$$

Calculate the difference between the two equations above. It concludes

$$b_i = \frac{1}{i}, i \geq 3,$$

$$L(m) = 1 + \sum_{i=3}^m \frac{1}{i}.$$

For the complete random causal graph with variables  $X_1, X_2, \dots, X_p, Y$ . We denote the expected number of interventions to discover the ancestor causal structure by  $T(p)$ . It should be less than the sum of expected number  $S(i)$  to identify the subgraph induced by  $X_1, X_2, \dots, X_{i-1}, Y$  and the expected number  $L(p + 2 - i)$  to identify the subgraph induced by

$Y, X_i, X_{i+1}, \dots, X_p$ . Hence we have

$$\begin{aligned}
 T(p) &\leq \frac{1}{p+1} \sum_{i=1}^{p+1} (S(i) + L(p+2-i)) \\
 &= \frac{1}{p+1} \sum_{i=1}^{p+1} S(i) + \frac{1}{p+1} \sum_{i=1}^{p+1} L(i) \\
 &= \left( \frac{p+1}{3} + \frac{2}{3} \frac{1}{p+1} \right) + \left( \frac{1}{p+1} + \frac{p+2}{p+1} \sum_{j=3}^{p+1} \frac{1}{j} \right) \\
 &\leq \frac{p+1}{3} + \frac{5}{3} \frac{1}{p+1} + \frac{p+2}{p+1} \int_{i=2}^{p+1} \frac{1}{j} dj \\
 &= \frac{p+1}{3} + \frac{5}{3} \frac{1}{p+1} + \frac{p+2}{p+1} \ln \frac{p+1}{2}.
 \end{aligned}$$

And then, it is evident that

$$\begin{aligned}
 T(p) &\geq \frac{1}{p+1} \sum_{i=1}^{p+1} S(i) \\
 &= \frac{p+1}{3} + \frac{2}{3} \frac{1}{p+1}.
 \end{aligned}$$

We then get the desired conclusion.  $\square$

Next, we provide the expected number of interventions by our approach. We emphasize only the interventional data of response variable is observable in our approach.

**Lemma 5.** *For a complete causal graph  $G$  with variables  $X_1, X_2, \dots, X_p, Y, p \geq 3$ , in which  $Y$  is the descendant of all other variables. Given the essential graph  $Ess_G$  (the essential graph is the skeleton when the causal graph is complete), the expected number of interventions  $F(p)$  to discover the ancestor causal structure by our approach is bounded by  $\frac{2}{3}(p+1) - 1 \leq F(p) \leq \frac{2}{3}(p+1) - \frac{2}{3} + \ln \frac{p}{2}$ , in the setting that only the interventional data of response variable is observable.*

*Proof.* The complete graph has an exact causal order. Without loss of generality, we assume the order is  $X_1, X_2, \dots, X_p, Y$ . According to the condition, each variable from  $X_1, \dots, X_p$  is equally likely to be subject to an intervention in the first experiment.

We consider an intervention on  $X_i$ . We can identify the edge  $X_i \rightarrow Y$ . Besides, if  $X_j$  is such that  $X_j \rightarrow X_i, X_j \rightarrow Y$ , the two edges can be identified. It is because these back-door paths cannot be d-separated by any other variables, the variable  $X_j$  must exist in all minimal parental back-door admissible sets of  $X_i$  consistent to the real causal structure. Hence we know some edges of  $X_j, j \leq i$  can be identified by intervention on  $X_i$ , while no edges of  $X_j, j > i$  can be identified. Evidently all variables belong to a common chain component. In our intervention variable selection criterion, we will select the variable with the maximum siblings. Hence in the next intervention we will select a variable from  $X_{i+1}, \dots, X_p$  with the same possibility. We repeat the process until intervening on  $X_p$ , because no edges of  $X_p$  can be identified unless we intervene on it and it has the maximum siblings. This is the first stage ending with intervening on  $X_p$ . The expected number of interventions in the first stage is denoted by  $K(p)$ .  $K(1) = 1$ . We have

$$\begin{aligned}
 K(p) &= 1 + \frac{1}{p} \sum_{i=1}^p K(p-i) \\
 &= 1 + \frac{1}{p} \sum_{i=0}^{p-1} K(i).
 \end{aligned}$$



Similar to the derivation process in Lemma 4, we conclude that

$$K(p) = 1 + \sum_{i=3}^p \frac{1}{i}.$$

After we intervene on  $X_p$ , we have identified all the edges  $X_i \rightarrow Y, 1 \leq i \leq p$  and  $X_i \rightarrow X_p, i < p$ . Hence the remaining undirected edges are a subset of edges between  $X_1, \dots, X_p$ . Then we consider the expected number of interventions to identify the causal structure between  $X_1, X_2, \dots, X_p$ . In the first stage, it is possible that we have intervened on some variables from  $X_1, \dots, X_{p-1}$ . Here we just consider the upper bound of intervention cost, that is we consider no edges between  $X_1, \dots, X_{p-1}$  have been identified. In this condition, when we intervene on some variable  $X_k$ , all the other variables from  $X_1, \dots, X_{p-1}$  are the “next” variable in the shortest path to  $Y$ . By Lemma 1, the edges between  $X_k$  and  $X_m$  can be identified for all  $1 \leq m \leq p-1, m \neq k$ . Hence in this condition identifying the causal edges from the interventional data of  $Y$  by our approach is equivalent to that from the interventional data of full variables in Eberhardt (2007). The expected number  $S(i-1)$  of interventions to discover the subgraph with  $i-1$  variables is  $\frac{2}{3}(i-1) - \frac{1}{3}$ , as shown in Lemma 2.

We denote the expected number of interventions to identify the ancestor causal structure in the complete graph with  $p+1$  variables in which  $Y$  is the descendant of all other variables by  $F(p)$ . According to the analysis above, the total intervention process is divided into two stages. The first one is we intervene until intervening on  $X_p$ . The expected number of interventions is  $K(p)$ . The other is we identify the causal structure between  $X_1, \dots, X_{p-1}$ . Hence we have

$$\begin{aligned} F(p) &\leq K(p) + S(p-1), p \geq 3 \\ &\leq 1 + \sum_{i=3}^p \frac{1}{i} + \frac{2}{3}(p-1) - \frac{1}{3}, p \geq 3 \\ &\leq \frac{2}{3}p + \ln \frac{p}{2}, p \geq 3. \end{aligned}$$

We thus obtain an upper bound for the expected number of interventions to identify the ancestor causal structure. Then, we present a lower bound. For the skeleton  $Ess$  of the complete causal graph, we orient all the edges  $X_i \rightarrow Y, 1 \leq i \leq p$  and get a new PDAG  $H$ . It is evident that the expected number of interventions to identify the ancestor causal structure based on  $H$  is less than that to identify the ancestor causal structure based on the  $Ess$ . Because the intervention strategy in these two graphs are the same, but the former one has less edges to be oriented. Hence a lower bound for  $F(p)$  is the expected number of interventions to identify the ancestor causal structure based on  $H$ . We have shown that in this condition identifying the causal edges from the interventional data of  $Y$  by our approach is equivalent to that from the interventional data of full variables in Eberhardt (2007). Hence the number is  $\frac{2}{3}p - \frac{1}{3}$ . It thus holds

$$\begin{aligned} \frac{2}{3}p - \frac{1}{3} &\leq F(p) \leq \frac{2}{3}p + \ln \frac{p}{2}, p \geq 3, \\ \frac{2}{3} - \frac{1}{p+1} &\leq \frac{F(p)}{p+1} \leq \frac{2}{3} - \frac{2}{3p+3} + \frac{1}{p+1} \ln \frac{p}{2}, p \geq 3, \\ \lim_{p \rightarrow \infty} \frac{F(p)}{p+1} &= \frac{2}{3}. \end{aligned}$$

The proof completes. □

**Proposition 5.** For a complete skeleton with  $p+1 \geq 4$  variables  $X_1, \dots, X_p, Y$ , if all the causal relations and positions of variables  $X_1, \dots, X_p, Y$  are totally random, then the expected number of interventions to make causal effect identification is less than  $\frac{5}{6}(p+1) - \frac{11p-10}{6p+6} + \ln \frac{p}{2}$ .

*Proof.* In a complete graph, there is an exact causal order for  $p+1$  variables, in which  $Y$  is located in each position with the same possibility. Without loss of generality, we assume the causal order is  $X_1, X_2, \dots, X_i, Y, X_{i+1}, \dots, X_p$ . Each variable  $X_j$  after  $Y$  costs one intervention to identify its edge with  $Y$ . (Because when we intervene on  $X_j, j \leq i$ , these edges cannot be identified. And when we intervene on  $X_j, j > i$ , the distribution of  $Y$  remains. The edge between other  $X_k, k > i, k \neq j$  and  $Y$  is still unidentified.) There thus needs  $p-i$  interventions to discover these edges ( $X_j - Y, j > i$ ). For the complete

subgraph induced by  $Y$  and all its ancestors  $X_1, \dots, X_i, Y$ , we denote the expected number of interventions by  $F(i)$ . Hence the expected number  $C(p)$  to identify the whole ancestor causal structure meets

$$\begin{aligned} C(p) &= \frac{1}{p+1} \sum_{i=0}^p (p-i + F(i)) \\ &= \frac{p}{2} + \frac{1}{p+1} \left(1 + \frac{3}{2} + \sum_{i=3}^p (F(i))\right). \end{aligned}$$

Lemma 5 provides the upper bound for the expected number of interventions  $F(i)$  to identify the causal structure between  $X_1, X_2, \dots, X_i, Y$ . Hence

$$\begin{aligned} \sum_{i=3}^p F(i) &\leq \sum_{i=3}^p \left( \frac{2}{3}i + \sum_{j=3}^i \frac{1}{j} \right) \\ &\leq \frac{1}{3}p^2 + \frac{p}{3} - 2 + \sum_{j=3}^p \sum_{i=j}^p \frac{1}{j} \\ &\leq \frac{1}{3}p^2 + \frac{p}{3} - 2 + \sum_{j=3}^p (p-j+1) \frac{1}{j} \\ &\leq \frac{1}{3}p^2 + \frac{p}{3} - 2 - (p-2) + (p+1) \sum_{j=3}^p \frac{1}{j} \\ &\leq \frac{1}{3}p^2 - \frac{2p}{3} + (p+1) \int_{j=2}^p \frac{1}{j} dj \\ &\leq \frac{1}{3}p^2 - \frac{2p}{3} + (p+1) \ln \frac{p}{2}. \end{aligned}$$

Hence,

$$\begin{aligned} C(p) &\leq \frac{p}{2} + \frac{5}{2(p+1)} + \frac{1}{p+1} \left( \frac{1}{3}p^2 - \frac{2p}{3} + (p+1) \ln \frac{p}{2} \right) \\ &\leq \frac{5}{6}(p+1) - \frac{11p-10}{6p+6} + \ln \frac{p}{2}, p \geq 3. \end{aligned}$$

The proof completes. □

## Appendix E: Supplement to the experiments

In this part, we give a detailed illustration about the experiments in the main paper. In the example to show the process of identifying causal structure by various approaches, we generate the non-linear data by the following equations. And when

we intervene, the intervention value is set to the mean of the intervened variable in the observational data.

$$\begin{aligned}
 X_1 &= E_1, & E_1 &\sim N(0, 1), \\
 X_2 &= \frac{3}{2} \sin(X_1) + E_2, & E_2 &\sim U(-0.2, 0.2), \\
 X_3 &= -2X_1 + X_2^2 + E_3, & E_3 &\sim N(0, 0.5), \\
 X_4 &= 2X_3 + E_4, & E_4 &\sim U(-0.01, 0.01), \\
 X_5 &= (X_4 + E_5)^2, & E_5 &\sim N(0, 0.3), \\
 X_6 &= \exp^{\sin(X_5 + 2X_2) + 2} + E_6, & E_6 &\sim t(10), \\
 X_7 &= \tan(X_4) + E_7, & E_7 &\sim \text{Exp}(2), \\
 X_8 &= \left(\frac{1}{1 + X_7}\right)^{\frac{2}{3}} + E_8, & E_8 &\sim \chi^2(4), \\
 X_9 &= X_7^2 + X_8 + E_9, & E_9 &\sim N(0, 0.5), \\
 X_{10} &= 2X_6 + E_{10}, & E_{10} &\sim \chi^2(2), \\
 X_{11} &= \frac{1}{X_6} + X_{10} + E_{11}, & E_{11} &\sim \text{Exp}(4).
 \end{aligned}$$

In the application to the real-world data, we apply our approach on a dataset used in causal discovery with both observational and interventional data (Sachs et al., 2005). It consists of 7466 measurements of the abundance of phosphoproteins and phospholipids recorded under different experimental conditions in primary human immune system cells. After processing, 5846 measurements remain. The number of samples under each intervention is shown in Table 1. And the causal structure is presented in Fig. 2.

Table 1. The number of samples under each intervention.

| Intervention targets | None | Akt | PKC | PIP2 | Mek | PIP3 |
|----------------------|------|-----|-----|------|-----|------|
| #samples             | 1755 | 911 | 723 | 810  | 799 | 848  |

Figure 2. The ground-truth causal graph of the protein dataset.

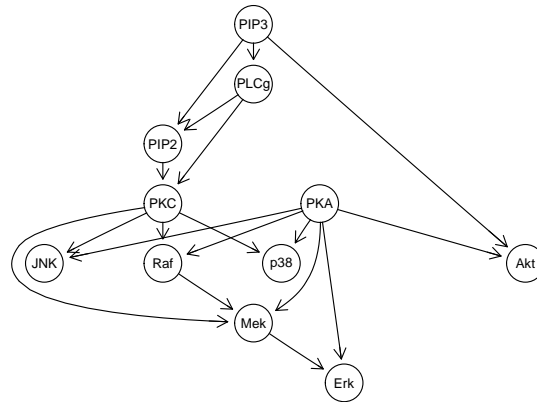

## References

- Andersson, S. A., Madigan, D., Perlman, M. D., et al. A characterization of markov equivalence classes for acyclic digraphs. *The Annals of Statistics*, 25(2):505–541, 1997.
- Eberhardt, F. Causation and intervention. *Unpublished doctoral dissertation, Carnegie Mellon University*, pp. 93, 2007.
- He, Y.-B. and Geng, Z. Active learning of causal networks with intervention experiments and optimal designs. *Journal of Machine Learning Research*, 9:2523–2547, 2008.
- Lauritzen, S. L. and Richardson, T. S. Chain graph models and their causal interpretations. *Journal of the Royal Statistical Society: Series B (Statistical Methodology)*, 64(3):321–348, 2002.
- Pearl, J. *Causality*. Cambridge University Press, 2009.
- Sachs, K., Perez, O., Pe'er, D., Lauffenburger, D. A., and Nolan, G. P. Causal protein-signaling networks derived from multiparameter single-cell data. *Science*, 308(5721):523–529, 2005.
